# Supplementary material for: Semisynthesis of esters and oxime esters/sulfonates from furyl-ring-based acetylation derivatives of fraxinellone as insecticidal agents
Source: Royal Society of Chemistry journal article supplement (doi:10.1039/c7ra03588h), 2017-01-01
Supplement: c7ra03588h1.pdf [file c7ra03588h1.pdf]

Supporting Information

**Semisynthesis of esters and oxime esters/sulfonates from furyl-ring-based acetylation derivatives of fraxinellone as insecticidal agents**

Yong Guo,<sup>1</sup> Ruige Yang<sup>1,a</sup> and Hui Xu<sup>\*a,b</sup>

<sup>a</sup>Research Institute of Pesticidal Design & Synthesis, College of Chemistry & Pharmacy, Northwest A&F University, Yangling 712100, Shaanxi Province, China. E-mail: [orgxuhui@nwsuaf.edu.cn](mailto:orgxuhui@nwsuaf.edu.cn); Fax: +86-29-87091952; Tel: +86-29-87091952.

<sup>b</sup>Shaanxi Key Laboratory of Natural Products & Chemical Biology, Northwest A&F University, Yangling 712100, Shaanxi Province, China.

<sup>1</sup>These authors contributed equally to this work

*Data for 8f*: Colorless liquid, yield: 98%;  $[\alpha]_D^{20} = -18$  (*c* 4.3 mg/mL, acetone); IR  $\text{cm}^{-1}$ : 3023, 2965, 2940, 1730, 1589, 1266, 1011;  $^1\text{H NMR}$  (400 MHz,  $\text{CDCl}_3$ )  $\delta$ : 7.89 (d,  $J = 8.4$  Hz, 2H, -Ph), 7.56 (d,  $J = 8.4$  Hz, 2H, -Ph), 7.44 (s, 1H, H-2'), 6.35 (s, 1H, H-4'), 6.14-6.19 (m, 1H, -O(CH)CH<sub>3</sub>), 4.84 (s, 1H, H-8), 2.13-2.31 (m, 2H, H-4), 2.11 (s, 3H, H-10), 1.73-1.87 (m, 3H, H-5, 6), 1.70 (d,  $J = 2.0$  Hz, 1.5H, -OH(CH)CH<sub>3</sub>), 1.69 (d,  $J = 2.0$  Hz, 1.5H, -OH(CH)CH<sub>3</sub>), 1.40-1.47 (m, 1H, H-6), 0.84-0.86 (m, 3H, H-11). HRMS (ESI): Calcd for  $\text{C}_{23}\text{H}_{27}\text{O}_5\text{NBr}$  ( $[\text{M}+\text{NH}_4]^+$ ), 476.1067; found, 476.1062.

*Data for 8g*: Colorless liquid, yield: 94%;  $[\alpha]_D^{20} = -22$  (*c* 4.1 mg/mL, acetone); IR  $\text{cm}^{-1}$ : 2959, 2924, 2854, 1756, 1719, 1268, 1048, 767;  $^1\text{H NMR}$  (400 MHz,  $\text{CDCl}_3$ )  $\delta$ : 8.13 (d,  $J = 8.0$  Hz, 2H, -Ph), 7.73 (d,  $J = 8.8$  Hz, 2H, -Ph), 7.44 (s, 1H, H-2'), 6.38 (s, 1H, H-4'), 6.16-6.22 (m, 1H, -O(CH)CH<sub>3</sub>), 4.84 (s, 1H, H-8), 2.18-2.31 (m, 2H, H-4), 2.16 (s, 3H, H-10), 1.79-1.87 (m, 2H, H-5, 6), 1.73 (d,  $J = 1.6$  Hz, 1.5H, -OH(CH)CH<sub>3</sub>), 1.71 (d,  $J = 1.6$  Hz, 1.5H, -OH(CH)CH<sub>3</sub>), 1.41-1.47 (m, 2H, H-5, 6), 0.86-0.87 (m, 3H, H-11). HRMS (ESI): Calcd for  $\text{C}_{24}\text{H}_{27}\text{O}_5\text{N}_2$  ( $[\text{M}+\text{NH}_4]^+$ ), 423.1914;

found, 423.1910.

*Data for 8h*: Colorless liquid, yield: 90%;  $[\alpha]^{20}_D = -13$  (*c* 4.2 mg/mL, acetone); IR  $\text{cm}^{-1}$ : 2939, 2873, 1755, 1721, 1446, 1269, 1201, 1048;  $^1\text{H NMR}$  (400 MHz,  $\text{CDCl}_3$ )  $\delta$ : 7.83 (dd,  $J = 7.6, 1.2$  Hz, 1H, -Ph), 7.70 (d,  $J = 9.6$  Hz, 1H, -Ph), 7.44 (s, 1H, H-2'), 7.38-7.42 (m, 1H, -Ph), 7.23-7.28 (m, 1H, -Ph), 6.36 (s, 1H, H-4'), 6.14-6.20 (m, 1H, -O(CH)CH<sub>3</sub>), 4.84 (s, 1H, H-8), 2.18-2.31 (m, 2H, H-4), 2.13 (s, 3H, H-10), 1.79-1.83 (m, 3H, H-5, 6), 1.71 (d,  $J = 2.0$  Hz, 1.5H, -OH(CH)CH<sub>3</sub>), 1.70 (d,  $J = 2.0$  Hz, 1.5H, -OH(CH)CH<sub>3</sub>), 1.40-1.48 (m, 1H, H-6), 0.87-0.88 (m, 3H, H-11). HRMS (ESI): Calcd for  $\text{C}_{23}\text{H}_{27}\text{O}_5\text{NF}$  ( $[\text{M}+\text{NH}_4]^+$ ), 416.1868; found, 416.1864.

*Data for 8i*: Colorless liquid, yield: 82%;  $[\alpha]^{20}_D = -15$  (*c* 3.5 mg/mL, acetone); IR  $\text{cm}^{-1}$ : 2937, 2873, 1755, 1720, 1254, 1048, 984;  $^1\text{H NMR}$  (400 MHz,  $\text{CDCl}_3$ )  $\delta$ : 8.01 (s, 1H, -Ph), 7.92 (dd,  $J = 7.6, 1.2$  Hz, 1H, -Ph), 7.51 (d,  $J = 8.8$  Hz, 1H, -Ph), 7.44 (s, 1H, H-2'), 7.36 (t,  $J = 8.0$  Hz, 1H, -Ph), 6.36 (s, 1H, H-4'), 6.14-6.20 (m, 1H, -O(CH)CH<sub>3</sub>), 4.84 (s, 1H, H-8), 2.17-2.31 (m, 2H, H-4), 2.13 (s, 3H, H-10), 1.80-1.83 (m, 3H, H-5, 6), 1.71 (d,  $J = 2.0$  Hz, 1.5H, -OH(CH)CH<sub>3</sub>), 1.70 (d,  $J = 2.4$  Hz, 1.5H, -OH(CH)CH<sub>3</sub>), 1.40-1.48 (m, 1H, H-6), 0.87-0.88 (m, 3H, H-11). HRMS (ESI): Calcd for  $\text{C}_{23}\text{H}_{22}\text{O}_5\text{Cl}$  ( $[\text{M}-\text{H}]^+$ ), 413.1150; found, 413.1148.

*Data for 8j*: Colorless liquid, yield: 83%;  $[\alpha]^{20}_D = -12$  (*c* 4.2 mg/mL, acetone); IR  $\text{cm}^{-1}$ : 2921, 2870, 2853, 1747, 1723, 1420, 1250, 1047;  $^1\text{H NMR}$  (400 MHz,  $\text{CDCl}_3$ )  $\delta$ : 8.16 (t,  $J = 1.6$  Hz, 1H, -Ph), 7.96 (dd,  $J = 7.6, 1.2$  Hz, 1H, -Ph), 7.67 (d,  $J = 8.0$  Hz, 1H, -Ph), 7.44 (s, 1H, H-2'), 7.29 (t,  $J = 8.0$  Hz, 1H, -Ph), 6.36 (s, 1H, H-4'), 6.14-6.20 (m, 1H, -O(CH)CH<sub>3</sub>), 4.84 (s, 1H, H-8), 2.18-2.31 (m, 2H, H-4), 2.13 (s, 3H, H-

10), 1.79-1.83 (m, 3H, H-5, 6), 1.71 (d,  $J = 8.4$  Hz, 1.5H, -OH(CH)CH<sub>3</sub>), 1.69 (d,  $J = 8.4$  Hz, 1.5H, -OH(CH)CH<sub>3</sub>), 1.40-1.48 (m, 1H, H-6), 0.87-0.88 (m, 3H, H-11).

HRMS (ESI): Calcd for C<sub>23</sub>H<sub>27</sub>O<sub>5</sub>NBr ([M+NH<sub>4</sub>]<sup>+</sup>), 476.1067; found, 476.1062.

*Data for 9f*: White solid, yield: 67%, m.p. 154-156 °C;  $[\alpha]^{20}_D = -19$  (c 3.8 mg/mL, acetone); IR cm<sup>-1</sup>: 2925, 2852, 1748, 1589, 1255, 1055, 910; <sup>1</sup>H NMR (500 MHz, CDCl<sub>3</sub>)  $\delta$ : 7.96 (d,  $J = 8.5$  Hz, 2H, -Ph), 7.63 (d,  $J = 8.5$  Hz, 2H, -Ph), 7.62 (s, 1H, H-2'), 6.97 (s, 1H, H-4'), 4.88 (s, 1H, H-8), 2.44 (s, 3H, -CH<sub>3</sub>), 2.19-2.32 (m, 2H, H-4), 2.14 (s, 3H, H-10), 1.84-1.87 (m, 2H, H-5, 6), 1.72-1.76 (m, 1H, H-5), 1.45-1.49 (m, 1H, H-6), 0.87 (s, 3H, H-11). HRMS (ESI): Calcd for C<sub>23</sub>H<sub>23</sub>O<sub>5</sub>NBr ([M+H]<sup>+</sup>), 472.0754; found, 472.0749.

*Data for 9g*: White solid, yield: 70%, m.p. 188-190 °C;  $[\alpha]^{20}_D = -27$  (c 3.1 mg/mL, acetone); IR cm<sup>-1</sup>: 2936, 2865, 1746, 1262, 1070, 910; <sup>1</sup>H NMR (500 MHz, CDCl<sub>3</sub>)  $\delta$ : 8.20 (d,  $J = 8.5$  Hz, 2H, -Ph), 7.80 (d,  $J = 8.0$  Hz, 2H, -Ph), 7.63 (s, 1H, H-2'), 6.99 (s, 1H, H-4'), 4.89 (s, 1H, H-8), 2.46 (s, 3H, -CH<sub>3</sub>), 2.27-2.32 (m, 2H, H-4), 2.14 (s, 3H, H-10), 1.84-1.87 (m, 2H, H-5, 6), 1.71-1.77 (m, 1H, H-5), 1.45-1.50 (m, 1H, H-6), 0.87 (s, 3H, H-11). HRMS (ESI): Calcd for C<sub>24</sub>H<sub>23</sub>O<sub>5</sub>N<sub>2</sub> ([M+H]<sup>+</sup>), 419.1601; found, 419.1598.

*Data for 9h*: White solid, yield: 88%, m.p. 194-196 °C;  $[\alpha]^{20}_D = -13$  (c 3.3 mg/mL, acetone); IR cm<sup>-1</sup>: 2926, 2924, 1749, 1674, 1266, 1046, 901; <sup>1</sup>H NMR (500 MHz, CDCl<sub>3</sub>)  $\delta$ : 7.90-7.93 (m, 1H, -Ph), 7.77-7.79 (m, 1H, -Ph), 7.62 (s, 1H, H-2'), 7.47-7.50 (m, 1H, -Ph), 7.32-7.34 (m, 1H, -Ph), 6.97 (s, 1H, H-4'), 4.89 (s, 1H, H-8), 2.46 (s, 3H, -CH<sub>3</sub>), 2.27-2.28 (m, 1H, H-4), 2.18-2.21 (m, 1H, H-4), 2.14 (s, 3H, H-10),

1.85-1.87 (m, 2H, H-5, 6), 1.74-1.80 (m, 1H, H-5), 1.45-1.50 (m, 1H, H-6), 0.87 (s, 3H, H-11). HRMS (ESI): Calcd for  $C_{23}H_{23}O_5NF$  ( $[M+H]^+$ ), 412.1555; found, 412.1551.

*Data for 9i*: White solid, yield: 86%, m.p. 206-208 °C;  $[\alpha]_D^{20} = -25$  (c 4.0 mg/mL, acetone); IR  $cm^{-1}$ : 2927, 2870, 1753, 1675, 1427, 1244, 911;  $^1H$  NMR (500 MHz,  $CDCl_3$ )  $\delta$ : 8.07 (t,  $J = 1.5$  Hz, 1H, -Ph), 7.99 (d,  $J = 7.5$  Hz, 1H, -Ph), 7.62 (s, 1H, H-2'), 7.58-7.60 (m, 1H, -Ph), 7.43 (t,  $J = 8.0$  Hz, 1H, -Ph), 6.97 (s, 1H, H-4'), 4.89 (s, 1H, H-8), 2.46 (s, 3H,  $-CH_3$ ), 2.27-2.32 (m, 1H, H-4), 2.18-2.21 (m, 1H, H-4), 2.14 (s, 3H, H-10), 1.85-1.87 (m, 2H, H-5, 6), 1.74-1.78 (m, 1H, H-5), 1.45-1.50 (m, 1H, H-6), 0.87 (s, 3H, H-11). HRMS (ESI): Calcd for  $C_{23}H_{23}O_5NCl$  ( $[M+H]^+$ ), 428.1259; found, 428.1254.

*Data for 9j*: White solid, yield: 72%, m.p. 218-220 °C;  $[\alpha]_D^{20} = -16$  (c 3.4 mg/mL, acetone); IR  $cm^{-1}$ : 2926, 2871, 1753, 1678, 1230, 1206, 1048, 913;  $^1H$  NMR (500 MHz,  $CDCl_3$ )  $\delta$ : 8.22 (t,  $J = 1.5$  Hz, 1H, -Ph), 8.03 (dd,  $J = 7.0, 1.0$  Hz, 1H, -Ph), 7.73-7.76 (m, 1H, -Ph), 7.62 (s, 1H, H-2'), 7.36 (t,  $J = 8.0$  Hz, 1H, -Ph), 6.97 (s, 1H, H-4'), 4.89 (s, 1H, H-8), 2.46 (s, 3H,  $-CH_3$ ), 2.27-2.32 (m, 1H, H-4), 2.16-2.21 (m, 1H, H-4), 2.14 (s, 3H, H-10), 1.84-1.87 (m, 2H, H-5, 6), 1.73-1.77 (m, 1H, H-5), 1.44-1.50 (m, 1H, H-6), 0.87 (s, 3H, H-11). HRMS (ESI): Calcd for  $C_{23}H_{23}O_5NBr$  ( $[M+H]^+$ ), 472.0754; found, 472.0754.

*Data for 10f*: White solid, yield: 67%, m.p. 128-130 °C;  $[\alpha]_D^{20} = 119$  (c 3.4 mg/mL, acetone); IR  $cm^{-1}$ : 2953, 2924, 2853, 1746, 1252, 914;  $^1H$  NMR (500 MHz,  $CDCl_3$ )  $\delta$ : 7.93 (d,  $J = 9.0$  Hz, 2H, -Ph), 7.63 (d,  $J = 9.0$  Hz, 2H, -Ph), 7.55 (d,  $J = 2.0$  Hz, 1H,

H-5'), 6.73 (d,  $J = 2.0$  Hz, 1H, H-4'), 5.82 (s, 1H, H-8), 2.48 (s, 3H,  $-CH_3$ ), 2.21-2.24 (m, 2H, H-4), 2.14 (s, 3H, H-10), 2.04-2.09 (m, 1H, H-5), 1.80-1.83 (m, 1H, H-6), 1.62-1.67 (m, 2H, H-5, 6), 0.95 (s, 3H, H-11). HRMS (ESI): Calcd for  $C_{23}H_{23}O_5NBr$  ( $[M+H]^+$ ), 472.0754; found, 472.0747.

*Data for 10g*: White solid, yield: 85%, m.p. 206-208 °C;  $[\alpha]^{20}_D = 71$  ( $c$  3.1 mg/mL, acetone); IR  $cm^{-1}$ : 2953, 2923, 2851, 1749, 1460, 1256, 1065, 923;  $^1H$  NMR (500 MHz,  $CDCl_3$ )  $\delta$ : 8.17 (d,  $J = 8.5$  Hz, 2H, -Ph), 7.79 (d,  $J = 8.5$  Hz, 2H, -Ph), 7.57 (d,  $J = 1.5$  Hz, 1H, H-5'), 6.75 (d,  $J = 1.5$  Hz, 1H, H-4'), 5.81 (s, 1H, H-8), 2.50 (s, 3H,  $-CH_3$ ), 2.22-2.24 (m, 2H, H-4), 2.15 (s, 3H, H-10), 2.02-2.08 (m, 1H, H-5), 1.79-1.83 (m, 1H, H-6), 1.62-1.68 (m, 2H, H-5, 6), 0.96 (s, 3H, H-11). HRMS (ESI): Calcd for  $C_{24}H_{23}O_5N_2$  ( $[M+H]^+$ ), 419.1601; found, 419.1602.

*Data for 10h*: White solid, yield: 85%, m.p. 80-82 °C;  $[\alpha]^{20}_D = 49$  ( $c$  4.3 mg/mL, acetone); IR  $cm^{-1}$ : 2932, 2872, 1750, 1444, 1266, 910;  $^1H$  NMR (500 MHz,  $CDCl_3$ )  $\delta$ : 7.87 (d,  $J = 7.5$  Hz, 1H, -Ph), 7.74 (d,  $J = 9.0$  Hz, 1H, -Ph), 7.55 (d,  $J = 1.5$  Hz, 1H, H-5'), 7.47-7.49 (m, 1H, -Ph), 7.31-7.34 (m, 1H, -Ph), 6.74 (d,  $J = 0.8$  Hz, 1H, H-4'), 5.82 (s, 1H, H-8), 2.49 (s, 3H,  $-CH_3$ ), 2.21-2.24 (m, 2H, H-4), 2.14 (s, 3H, H-10), 2.04-2.09 (m, 1H, H-5), 1.81-1.83 (m, 1H, H-6), 1.63-1.65 (m, 2H, H-5, 6), 0.96 (s, 3H, H-11). HRMS (ESI): Calcd for  $C_{23}H_{23}O_5NF$  ( $[M+H]^+$ ), 412.1555; found, 412.1551.

*Data for 10i*: White solid, yield: 70%, m.p. 158-160 °C;  $[\alpha]^{20}_D = 111$  ( $c$  3.8 mg/mL, acetone); IR  $cm^{-1}$ : 2954, 2926, 2870, 1762, 1745, 1230, 1044, 879;  $^1H$  NMR (500

MHz, CDCl<sub>3</sub>)  $\delta$ : 8.04 (t,  $J = 2.0$  Hz, 1H, -Ph), 7.96 (d,  $J = 7.5$  Hz, 1H, -Ph), 7.58 (d,  $J = 8.0$  Hz, 1H, -Ph), 7.56 (d,  $J = 1.5$  Hz, 1H, H-5'), 7.42 (t,  $J = 8.0$  Hz, 1H, -Ph), 6.74 (d,  $J = 2.0$  Hz, 1H, H-4'), 5.82 (s, 1H, H-8), 2.50 (s, 3H, -CH<sub>3</sub>), 2.21-2.24 (m, 2H, H-4), 2.14 (s, 3H, H-10), 2.03-2.09 (m, 1H, H-5), 1.80-1.83 (m, 1H, H-6), 1.62-1.66 (m, 2H, H-5, 6), 0.96 (s, 3H, H-11). HRMS (ESI): Calcd for C<sub>23</sub>H<sub>23</sub>O<sub>5</sub>NCl ([M+H]<sup>+</sup>), 428.1259; found, 428.1254.

*Data for 10j*: White solid, yield: 72%, m.p. 148-150 °C; [ $\alpha$ ]<sub>D</sub><sup>20</sup> = 114 (*c* 3.8 mg/mL, acetone); IR cm<sup>-1</sup>: 2933, 2869, 1749, 1237, 1052, 912; <sup>1</sup>H NMR (500 MHz, CDCl<sub>3</sub>)  $\delta$ : 8.20 (s, 1H, -Ph), 8.00 (d,  $J = 8.0$  Hz, 1H, -Ph), 7.73 (d,  $J = 9.0$  Hz, 1H, -Ph), 7.55 (d,  $J = 2.0$  Hz, 1H, H-5'), 7.36 (t,  $J = 8.0$  Hz, 1H, -Ph), 6.74 (d,  $J = 2.0$  Hz, 1H, H-4'), 5.82 (s, 1H, H-8), 2.49 (s, 3H, -CH<sub>3</sub>), 2.21-2.24 (m, 2H, H-4), 2.14 (s, 3H, H-10), 2.03-2.08 (m, 1H, H-5), 1.80-1.83 (m, 1H, H-6), 1.62-1.68 (m, 2H, H-5, 6), 0.96 (s, 3H, H-11). HRMS (ESI): Calcd for C<sub>23</sub>H<sub>23</sub>O<sub>5</sub>NBr ([M+H]<sup>+</sup>), 472.0754; found, 472.0750.
